# Supplementary material for: In situ synthesis of ultrasmall MnO nanoparticles encapsulated by a nitrogen-doped carbon matrix for high-performance lithium-ion batteries
Source: Royal Society of Chemistry journal article supplement (doi:10.1039/c9cc03617b), 2019-01-01
Supplement: c9cc03617b1.pdf [file c9cc03617b1.pdf]

## Supporting Information

### In Situ Synthesis of Ultrasmall MnO Nanoparticles Encapsulated by Nitrogen-doped Carbon Matrix for High- performance Lithium-ion Batteries

Shi Tao, <sup>\*a</sup> Biao Li, <sup>b</sup> Jingyuan Zhang, <sup>a</sup> Peixin Cui, <sup>c</sup> Dajun Wu, <sup>a</sup> Wangsheng Chu, <sup>d</sup>

Bin Qian, <sup>\*a</sup> Li Song <sup>\*d</sup>

<sup>a</sup> Department of Physics and Electronic Engineering, Jiangsu Laboratory of Advanced Functional Materials, Changshu Institute of Technology, Changshu 215500, China

<sup>b</sup> Department of Energy and Resources, College of Engineering, Peking University, 100871, China

<sup>c</sup> Key Laboratory of Soil Environment and Pollution Remediation Institute of Soil Science, Chinese Academy of Sciences, 210008, China

<sup>d</sup> National Synchrotron Radiation Laboratory, University of Science and Technology of China, 230029, China

## Experimental section

### *Chemicals*

All chemicals were purchased and used without further purification. Manganese nitrate tetrahydrate [Mn(NO<sub>3</sub>)<sub>4</sub>·4H<sub>2</sub>O], N,N-Dimethylformamide (DMF) and triethylamine (TEA) were obtained from Sinopharm Chemical Reagent Shanghai Co.. Ethylenediaminetetraacetic acid (H<sub>4</sub>EDTA) was purchased from Sigma-Aldrich

(USA).

#### *Synthesis of MnO@NDC precursors*

8 mmol  $\text{Mn}(\text{NO}_3)_2 \cdot 4\text{H}_2\text{O}$  were dissolved into 40 mL DMF forming a solution, then added to a DMF solution of  $\text{H}_4\text{EDTA}$  (4 mmol) with 1.5 mL triethylamine. A precipitate was filtered and washed with DMF. The obtained white powder were collected after vacuum drying at 60 °C for overnight. The highly dispersed  $[\text{Mn}_2(\text{EDTA})]$  precursors were annealed from room temperature to 500-600 °C at a heating rate of 2  $\text{min}^{-1}$  in  $\text{N}_2$  atmosphere for 2 h. The  $\text{Mn}_2\text{O}_3$  sample was synthesized by annealing the MnO@NDC at 500 °C for 2h in the air atmosphere.

#### *Material Characterization*

The X-ray powder diffraction (XRD) pattern was recorded by a Bruker D8 ADVANCE X-ray diffractometer with  $\text{Cu K}_\alpha$  radiation ( $\lambda = 0.15418 \text{ nm}$ ) at a scanning rate of 4°  $\text{min}^{-1}$ . Field-emission scanning electron microscopy (SEM) images were obtained on a ZEISS microscope with an accelerating voltage of 20 kV. Transmission electron microscopy (TEM) images and high-resolution TEM (HRTEM) images were obtained by a JEOL JEM-2000CX instrument. Nitrogen adsorption and desorption isotherm was characterized by a ASAP2020. The XPS experiments were carried out on a PHI-5400 electron spectrometer. The Raman spectrum was performed by a Raman spectrometer (Horiba Xplora). The thermogravimetric analysis (TGA) was conducted on a thermogravimetric analyzer (TGA, SDTA851). Mn K-edge XAFS spectra of samples were recorded at the BL14W1 beamline of Shanghai synchrotron radiation facility (SSRF). To get the desired electrodes, the coin cells

were charged/discharged to the desired cutoff voltages and disassembled. The disassembled electrodes were washed with dimethyl carbonate (DMC) in the Ar-filled glove box, after drying, the electrodes were sealed by a 3M selloptape.

#### *Electrochemical Measurements*

The working electrode was prepared by mixing the MnO@NDC powder, acetylene black, and polyvinylidene difluoride (PVDF) in a weight ratio of 70:20:10. The slurry was pasted to Cu foil for LIBs, and then dried at 100 °C overnight under vacuum. CR2032-type coin cells were assembled in an argon-filled glovebox. For LIBs half-cells, Li-metal foil use as counter electrode, and 1.0 M LiPF<sub>6</sub> dissolved in ethylene carbonate (EC)/dimethyl carbonat (DMC)/diethyl carbonate (DEC) (1:1:1 by volume) use as electrolyte. The charge-discharge tests were carried out on LAND CT2001A systems. The cyclic voltammetry (CV) curves and electrochemical impedance spectroscopy (EIS) were tested on VSP electrochemical workstation (Bio-logic, France).

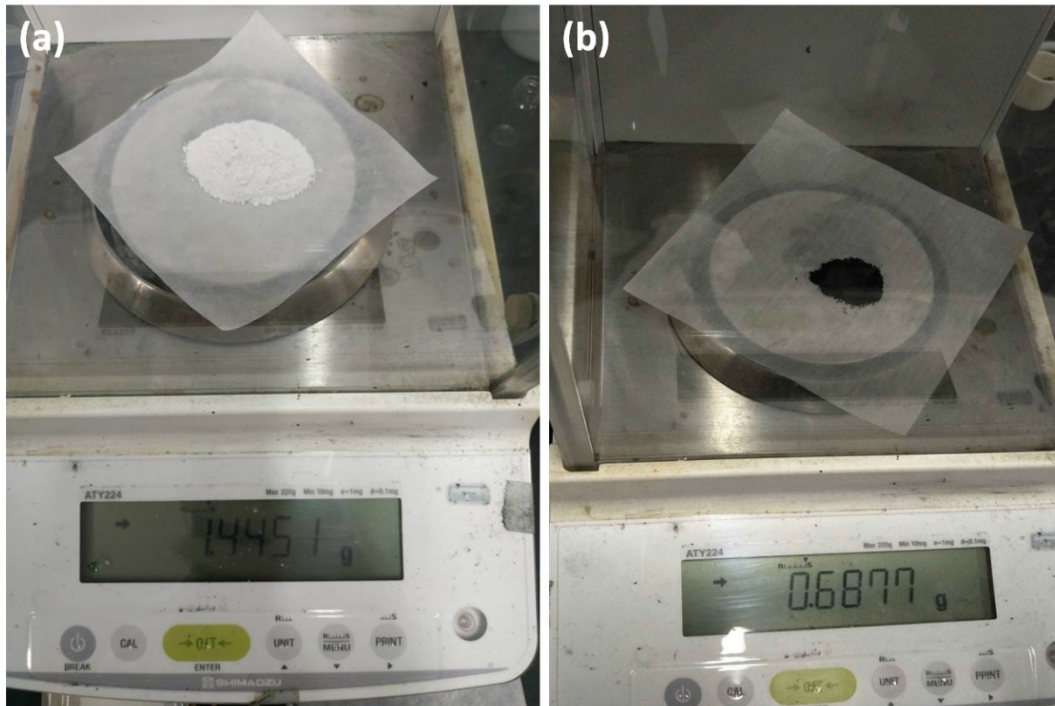

**Figure S1.** (a) Weight of the  $[\text{Mn}_2(\text{EDTA})]$  precursors. (b) Weight of the  $\text{MnO@NDC}$  powder.

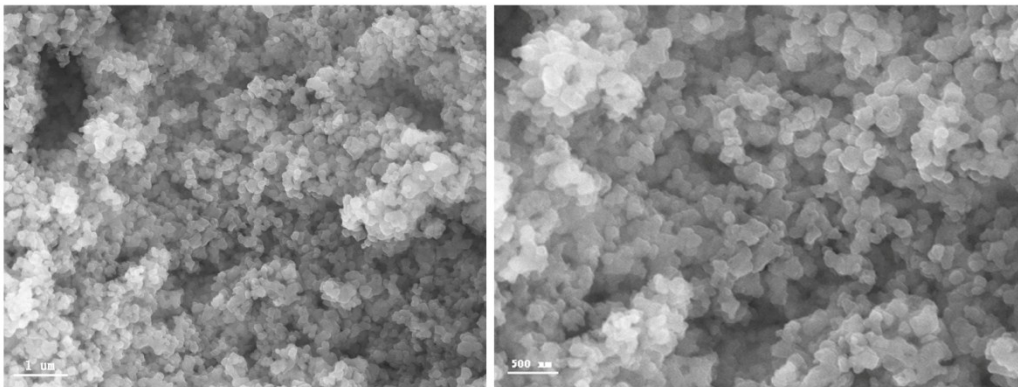

**Figure S2.** SEM images of the  $[\text{Mn}_2(\text{EDTA})]$  precursors at different magnification.

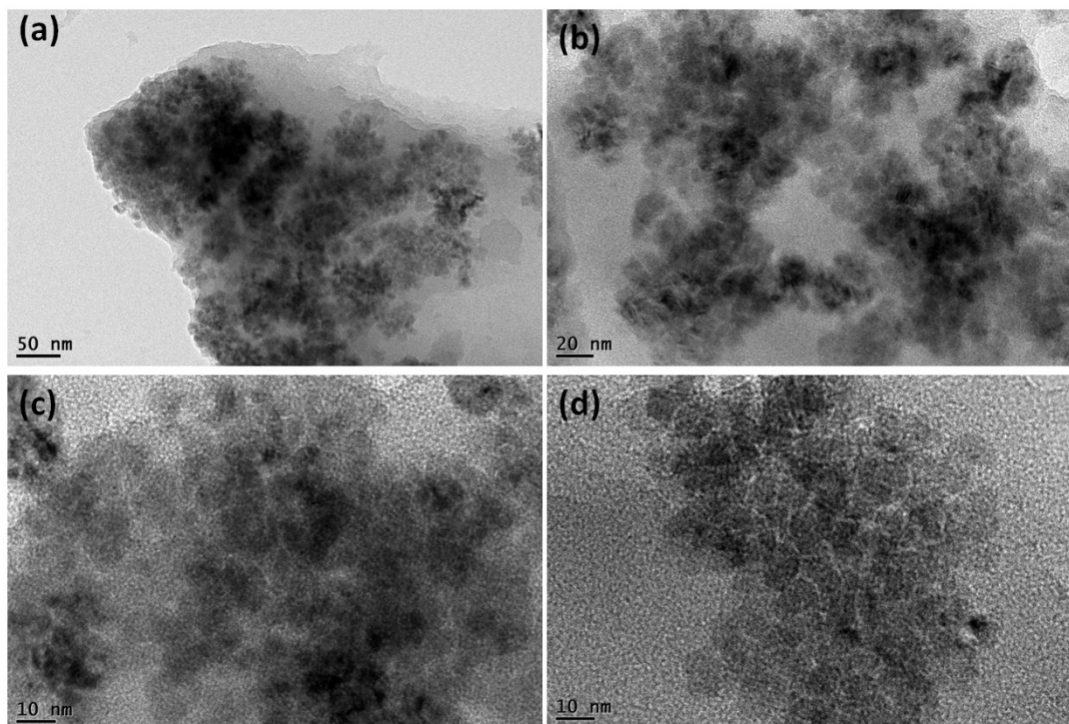

**Figure S3.** TEM images of MnO@NDC at different magnitude resolution.

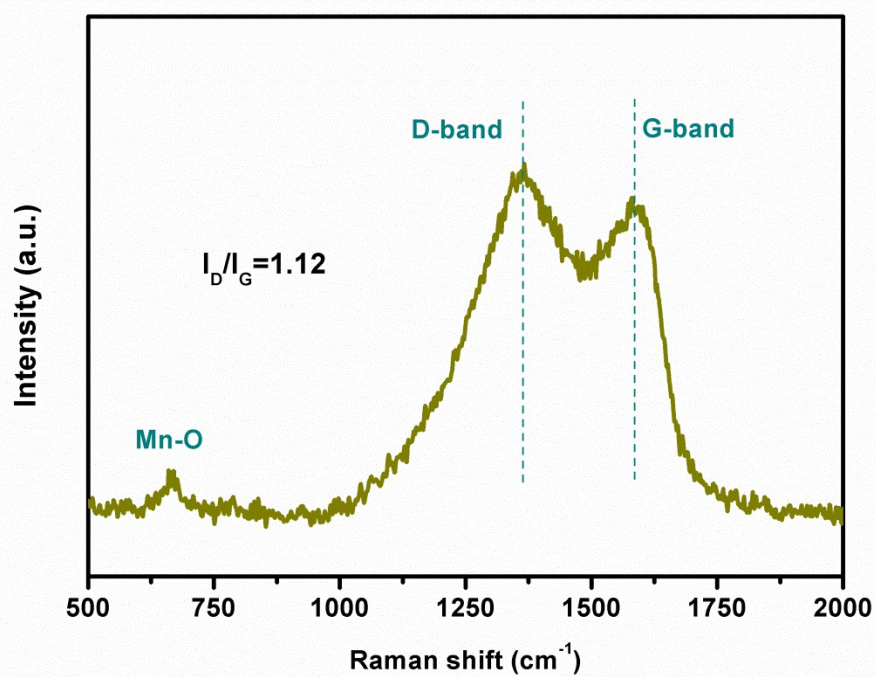

**Figure S4.** Raman spectra of the MnO@NDC.

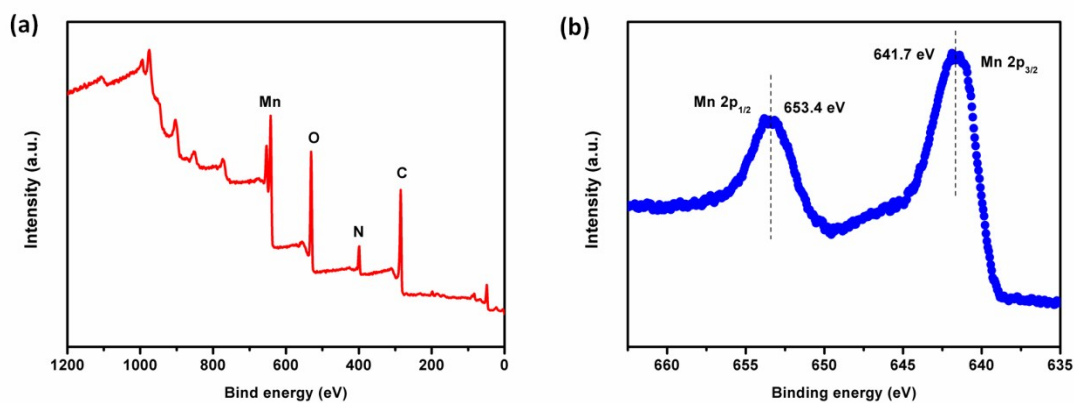

**Figure S5.** (a) XPS survey spectrum of MnO@NDC. (b) High-resolution XPS spectra of Mn 2p.

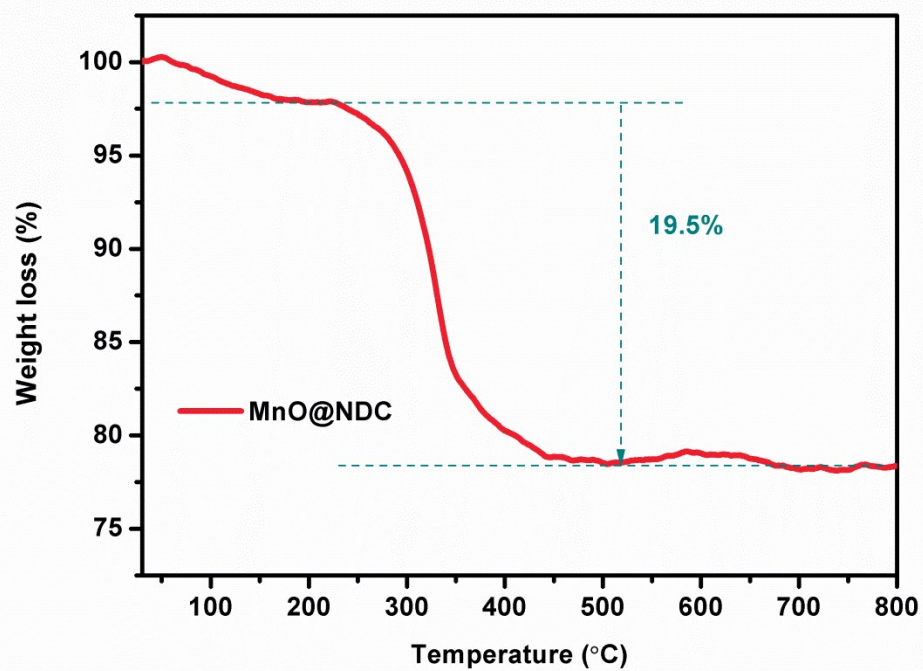

**Figure S6.** TGA curve of the MnO@NDC.

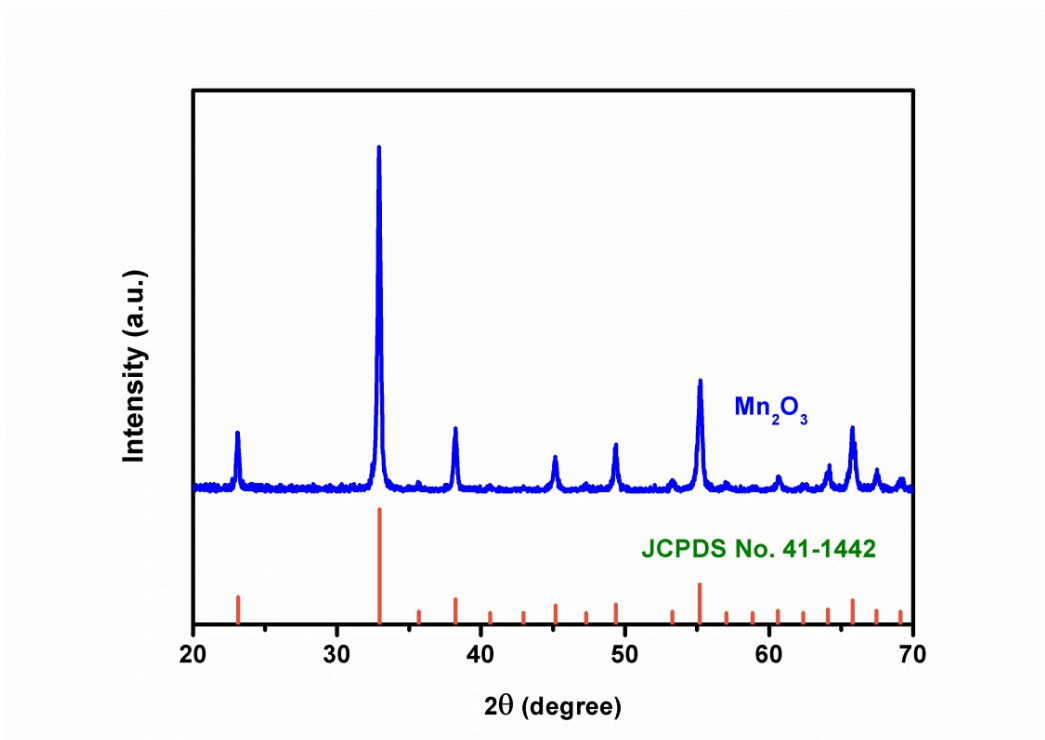

**Figure S7.** XRD pattern of as-prepared MnO@NDC after TGA test.

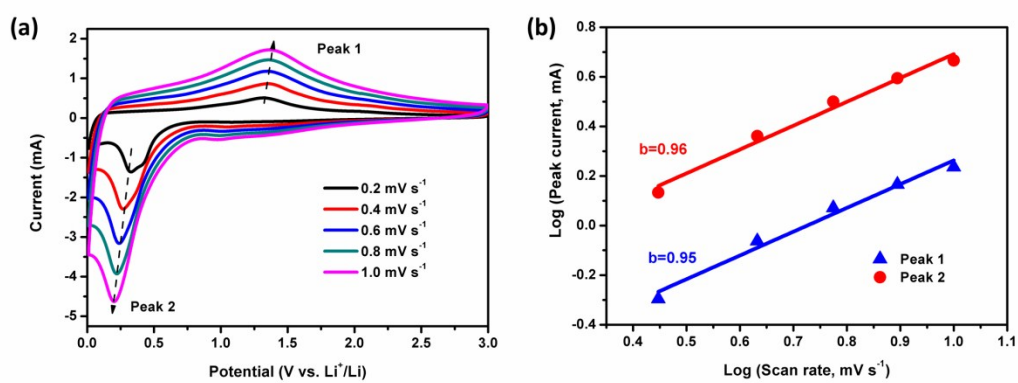

**Figure S8.** (a) CV curves at different sweep rates. (b) Relationship between logarithm cathodic peak current and logarithm scan rates.

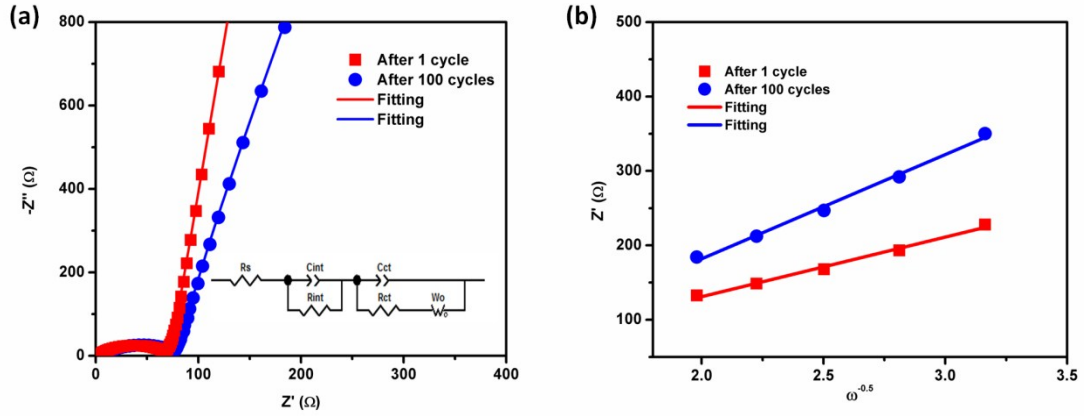

**Figure S9.** (a) The Nyquist plots and fitting of MnO/NDC electrode after 1 and 100 cycles for LIBs. (b) The relationship of  $Z'$  vs.  $\omega^{-1/2}$  is obtained by measuring the slope of the oblique line in the low frequency region.

The  $\text{Li}^+$  diffusion coefficient can be calculated from the formula as following:

$$D = \frac{R^2 T^2}{2A^2 n^4 F^4 C^2 \sigma^2} \quad (1)$$

$R$  is the gas constant and  $F$  is the Faraday constant.  $T$  is the temperature of environment experiment.  $A$  is the surface area of the electrode.  $n$  is the number of the electrons per molecule.  $\sigma$  is the slope of the line  $Z' \sim \omega^{-0.5}$ .  $C$  is the lithium ion concentration in the bulk electrode:

$$C = nV = \frac{(m/M)}{V} = \frac{(\rho V/M)}{V} = \frac{\rho}{M} \quad (2)$$

The lithium ion concentration in the bulk electrode is about  $8.9 \times 10^{-3} \text{ mol cm}^{-3}$ .



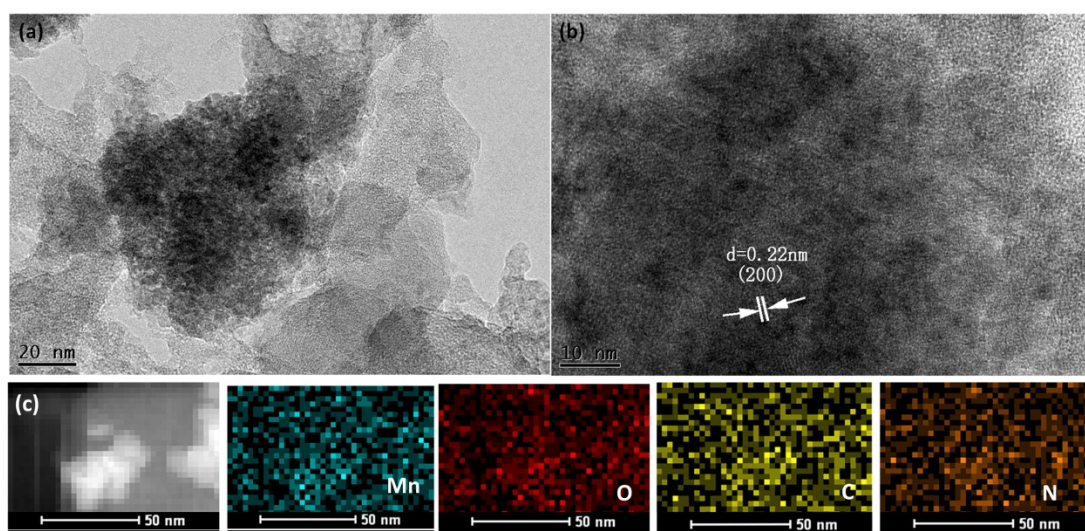

**Figure S10.** (a) TEM image of MnO@NDC electrode after 100 cycles. (b) HRTEM image of MnO@NDC electrode after 100 cycles. (c) EDX mapping for MnO@NDC electrode after 100 cycles.

**Table S1.** Comparison of the electrochemical performance for MnO-based anode in the previous literature with our sample

| Electrode materials | Rate performance                                 | Cycling performance                                                 | Ref |
|---------------------|--------------------------------------------------|---------------------------------------------------------------------|-----|
| MnO@CNFs            | 407 mAh g <sup>-1</sup> at 2.0 A g <sup>-1</sup> | 400 mAh g <sup>-1</sup> at 1.0 mA g <sup>-1</sup> after 500 cycles  | 1   |
| MnO/C               | 483 mAh g <sup>-1</sup> at 5.0 A g <sup>-1</sup> | 1625 mAh g <sup>-1</sup> at 1.0 A g <sup>-1</sup> after 1000 cycles | 2   |

---

|             |                                                    |                                                                      |    |
|-------------|----------------------------------------------------|----------------------------------------------------------------------|----|
| MnO@N-C/rGO | 448.9 mAh g <sup>-1</sup> at 2.0 A g <sup>-1</sup> | 425.0 mAh/g at 2.0 A g <sup>-1</sup> after 1300 cycles               | 3  |
| MnO@NCs     | 438.2 mAh g <sup>-1</sup> at 2.0 A g <sup>-1</sup> | 465.8 mAh g <sup>-1</sup> at 0.1 A g <sup>-1</sup> after 100 cycles  | 4  |
| MnO/NC      | 316.3 mAh g <sup>-1</sup> at 2.0 A g <sup>-1</sup> | 568.5 mAh g <sup>-1</sup> at 1.0 A g <sup>-1</sup> after 500 cycles  | 5  |
| MnO@C       | 680 mAh g <sup>-1</sup> at 2.0 A g <sup>-1</sup>   | 686.5 mAh g <sup>-1</sup> at 0.2 A g <sup>-1</sup> after 100 cycles  | 6  |
| G/MnO@C/G   | 504.4 mAh g <sup>-1</sup> at 4.0 A g <sup>-1</sup> | 471.3 mAh g <sup>-1</sup> at 4.0 A g <sup>-1</sup> after 4000 cycles | 7  |
| CNF/MnO     | 600 mAh g <sup>-1</sup> at 1.0 A g <sup>-1</sup>   | 983.8 mAh g <sup>-1</sup> at 0.2 A g <sup>-1</sup> after 100 cycles  | 8  |
| MnO@C       | 252 mAh g <sup>-1</sup> at 1.6 A g <sup>-1</sup>   | 613 mAh g <sup>-1</sup> at 1.0 A g <sup>-1</sup> after 1000 cycles   | 9  |
| MnO@C       | 380.1 mAh g <sup>-1</sup> at 7.6 A g <sup>-1</sup> | 596.3 mAh g <sup>-1</sup> at 3.8 A g <sup>-1</sup> after 1000 cycles | 10 |
| MnO/Ni/CNF  | 251.2 mAh g <sup>-1</sup> at 2.0 A g <sup>-1</sup> | 361.9 mAh g <sup>-1</sup> at 1.0 A g <sup>-1</sup> after 600 cycles  | 11 |
| MnO@NC      | 454 mAh g <sup>-1</sup> at 5.0 A g <sup>-1</sup>   | 624 mAh g <sup>-1</sup> at 1.0 A g <sup>-1</sup> after 1000 cycles   | 12 |

---

---

**MnO@NDC**      **446.8 mAh g<sup>-1</sup> at 10.0 A g<sup>-1</sup>**      **864.8 mAh g<sup>-1</sup> at 1.0 A g<sup>-1</sup> after 1000 cycles**      **This work**

---

**Table S2.** EXAFS fitting parameters at the Mn K-edge for various samples ( $S_0^2=0.813$ )

| Sample            | Shell | $N^a$ | $R(\text{\AA})^b$ | $\sigma^2(\text{\AA}^2)^c$ | $\Delta E_0(\text{eV})^d$ | R factor |
|-------------------|-------|-------|-------------------|----------------------------|---------------------------|----------|
| Mn foil           | Mn-Mn | 12    | 2.66              | 0.0027                     | 8.0                       | 0.0338   |
|                   | Mn-Mn | 4     | 2.80              | 0.0027                     |                           |          |
| Pristine          | Mn-O  | 5.8   | 2.24              | 0.0272                     | -0.5                      | 0.0006   |
|                   | Mn-Mn | 6.9   | 3.12              | 0.0090                     |                           |          |
| Dischar<br>1.5 V  | Mn-O  | 5.4   | 2.25              | 0.0243                     | 0.5                       | 0.0003   |
|                   | Mn-Mn | 7.6   | 3.11              | 0.0103                     |                           |          |
| Dischar<br>0.01 V | Mn-O  | 1.7   | 2.05              | 0.0228                     | -1.6                      | 0.0005   |
|                   | Mn-Mn | 8.3   | 2.74              | 0.0475                     |                           |          |
| Char 1.5 V        | Mn-O  | 2.2   | 2.06              | 0.0090                     | -6.9                      | 0.0005   |
|                   | Mn-Mn | 4.6   | 2.82              | 0.0339                     |                           |          |
| Char 3.0 V        | Mn-O  | 5.6   | 2.20              | 0.0194                     | -3.5                      | 0.0008   |
|                   | Mn-Mn | 8.5   | 3.12              | 0.0106                     |                           |          |

<sup>a</sup> $N$ : coordination numbers; <sup>b</sup> $R$ : bond distance; <sup>c</sup> $\sigma^2$ : Debye-Waller factors; <sup>d</sup>  $\Delta E_0$ : the

inner potential correction.  $R$  factor: goodness of fit.  $S_0^2$  was set to 0.813, according to the experimental EXAFS fit of MnO reference by fixing CN as the known crystallographic value.

**Table S3.** Equivalent circuit parameters of the MnO@NDC electrode for LIBs.

| Sample  | Cycle number            | $R_s$ /Ohm | $R_{int}$ /Ohm | $R_{ct}$ /Ohm |
|---------|-------------------------|------------|----------------|---------------|
| MnO@NDC | 1 <sup>st</sup> cycle   | 3.6        | 65.3           | 16.8          |
|         | 100 <sup>th</sup> cycle | 8.5        | 69.8           | 15.4          |

## References

- 1 L. Sheng, H. Jiang, S. Liu, M. Chen, T. Wei, Z. J. Fan, *J. Power Sources* **2018**, *397*, 325-333.
- 2 D. Kang, Q. Liu, R. Si, J. Gu, W. Zhang, D. Zhang, *Carbon* **2016**, *99*, 138-147.
- 3 W. Zhang, J. Li, J. Zhang, J. Sheng, T. He, M. Tian, Y. Zhao, C. Xie, L. Mai, S. Mu, *ACS Appl. Mater. Interfaces* **2017**, *9*, 12680-12686.
- 4 L. Zhang, D. Ge, G. Qu, J. Zheng, X. Cao, H. Gu, *Nanoscale* **2017**, *9*, 5451-5457.
- 5 Q. Ye, J. Ru, J. Peng, G. Chen, D. Wang, *Chem. Eng. J.* **2018**, *331*, 570-577.
- 6 J. Jia, X. Hu, Z. Wen, *Nano Res.* **2018**, *11*, 1135-1145.

- 7 J. Zhang, W. Zhang, T. He, I. S. Amiin, Z. Kou, J. Li, S. Mu, *Carbon* **2017**, *115*, 95-104.
- 8 T. Wang, H. Li, S. Shi, T. Liu, G. Yang, Y. Chao, F. Yin, *Small* **2017**, *13*, 1604182.
- 9 F. Zheng, Z. Yin, H. Xia, G. Bai, Y. Zhang, *Chem. Eng. J.* **2017**, *327*, 474-480.
- 10 Z. Cui, Q. Liu, C. Xu, R. Zou, J. Zhang, W. Zhang, G. Guan, J. Hu, Y. Sun, *J. Mater. Chem. A* **2017**, *5*, 21699-21708.
- 11 X. Kong, A. Pan, Y. Wang, D. Selvakumaran, J. Lin, X. Cao, S. Liang, G. Cao, *J. Mater. Chem. A* **2018**, *6*, 12316-12322.
- 12 G. Zhu, L. Wang, H. Lin, L. Ma, P. Zhao, Y. Hu, T. Chen, R. Chen, Y. Wang, Z. Tie, J. Liu, Z. Jin, *Adv. Funct. Mater.* **2018**, *28*, 1800003.
